# Supplementary material for: Contrasting continental patterns of adaptive population divergence in a holarctic fungus
Source: Research Square preprint supplement (doi:10.21203/rs.3.rs-1551701/v1), 2022-04-15
Supplement: Supplementary file 1 [file 126b45586eeb66496e719651.docx]

SI guide for: Contrasting continental patterns of adaptive population divergence in a holarctic fungus

Keaton Trembleab, Hoffman, J.I.c and Bryn T.M.Dentingerab

1. Univeristy of Utah, School of Biological Sciences, Salt Lake City, Utah, 84112.
2. Natural History Museum of Utah, Salt Lake City, Utah, 84108.
3. Bielefeld University, Department of Animal Behaviour, Bielefeld, Germany.
4. Supplementary Methods; Supplementary Figures S1-S16

This merged document contains an extended description of the methods used in this study as well as all supplementary figures and figure captions.

1. Supplementary Table 1; Supplementary Table 2; Supplementary Table 3; Supplementary Table 4

This merged excel document contains all supplementary tables and data produced by this work as separate sheets. Supplementary table 1 contains all specimen collection and voucher information, as well as sequencing information. Supplementary table 2 contains results of pairwise population analyses of *B. edulis* lineages. Supplementary table 3 contains the 19 Bioclim Variables for all specimens included in study. Supplementary table 4 contains results from outlier loci analysis and putative function of outlier loci.
