# Supplementary material for: Contrasting continental patterns of adaptive population divergence in a holarctic fungus
Source: Research Square preprint supplement (doi:10.21203/rs.3.rs-1551701/v1), 2022-04-15
Supplement: Supplementary file 3 [file d74c57ba57c588a882969ed2.xlsx]

## Sheet: Metadata
Supplemental Information for "Contrasting continental patterns of adaptive population divergence in a holarctic fungus"
Keaton Tremble
Hoffman, J. I.
Bryn T.M. Dentinger
Contents
1. Specimen collection and voucher information
2. Pairwise population analyses of B.edulis lineages. Contains population genomic and ecological niche model comparisons
3. 19 Bioclim Variables for all specimens included in study
4. Results from outlier loci analysis and putative function of outlier loci

## Sheet: sample_information
SampleID	AscencionID	Determination	#_trimmed_reads	mapping_depth	Sequencing Platform	lat	lon	lineage_determination	loaning_Institution	State/Country	collection_year	collection_month
61	61	non-edulis	1244231	na	MiSeq	na	na	non-edulis	University of Cambridge	Scotland	2009	na
475	UT-M0000475	Bedulis	7476739	na	NovaSeq	30.5634	-96.2123	non-edulis	Natural History Museum of Utah	Texas,USA	2018	June
477	UT-M0000477	Bedulis	8430584	43.477	NovaSeq	41.36	-76.8767	eastcoast	Natural History Museum of Utah	Pennsylvania, USA	2018	July
486	UT-M0000486	non-edulis	7457678	an	NovaSeq	na	na	non-edulis	Natural History Museum of Utah
511	UT-M0000511	non-edulis	8737482	na	HiSeq2500	na	na	non-edulis	Natural History Museum of Utah
20100815009	CORT014606	Bedulis	3771601	34.9947	MiSeq	40.6744	-110.963	westcoast	SUNY Cortland Fungaria	Utah, USA	2010	July
240	240	Bedulis	594761	6.21198	MiSeq	51.8999	16.6726	europe	University of Cambridge	Poland	2015	na
242	242	Bedulis	740085	7.6391	MiSeq	53.9525	17.9191	europe	University of Cambridge	Poland	2015	na
244	244	Bedulis	1089083	7.9826	MiSeq	53.8965	16.0853	europe	University of Cambridge	Poland	2015	na
249	UT-M0000249	Bedulis	7476317	41.1305	NovaSeq	47.0191	-122.895	westcoast	Natural History Museum of Utah	Washington,USA	2017	December
250	UT-M0000250	Bedulis	9148174	48.7363	NovaSeq	38.4131	-122.836	westcoast	Natural History Museum of Utah	California,USA	2017	November
284	UT-M0000284	Bedulis	9726081	52.3803	NovaSeq	40.724	-110.864	westcoast	Natural History Museum of Utah	Utah, USA	2017	September
285	UT-M0000285	Bedulis	7871760	43.7873	NovaSeq	40.724	-110.864	westcoast	Natural History Museum of Utah	Utah, USA	2017	September
286	UT-M0000286	Bedulis	7897042	43.457	NovaSeq	40.724	-110.864	westcoast	Natural History Museum of Utah	Utah, USA	2017	September
354	354	Bedulis	9041201	48.6122	NovaSeq	48.5631	-124.399	westcoast	Natural History Museum of Utah	British Columbia, Canada
473	UT-M0000473	Bedulis	7765796	42.0744	NovaSeq	42.326	-122.431	westcoast	Natural History Museum of Utah	Oregon,USA	2018	June
489	UT-M0000489	Bedulis	9803661	37.9461	NovaSeq	41.796	-124.105	westcoast	Natural History Museum of Utah	California,USA	2011	October
555	UT-M0000555	Bedulis	8455196	46.7074	NovaSeq	40.6754	-110.957	westcoast	Natural History Museum of Utah	Utah, USA	2019	July
557	UT-M0000557	Bedulis	7697993	42.1126	NovaSeq	40.594	-110.978	westcoast	Natural History Museum of Utah	Utah, USA	2019	July
567	UT-M0000567	Bedulis	7614658	41.3696	NovaSeq	40.1471	-74.6468	westcoast	Natural History Museum of Utah	Utah, USA	2019	July
598	UT-M0000598	Bedulis	7951775	41.9491	NovaSeq	40.6385	-74.4882	eastcoast	Natural History Museum of Utah	New Jersey,USA	2018	October
60	60	Bedulis	946801	8.1287	MiSeq	56.983	-3.38683	europe	University of Cambridge	Scotland	2009	na
600	UT-M0000600	Bedulis	11029934	57.4054	NovaSeq	40.6385	-74.4882	eastcoast	Natural History Museum of Utah	New Jersey,USA	2018	September
90	UT-M0000090	Bedulis	7483646	18.1109	NovaSeq	40.592	-111.013	westcoast	Natural History Museum of Utah	Utah, USA	2017	July
A19a-203	A19a-203	Bedulis	6466686	25.7569	NovaSeq	47.6378	-52.9426	eastcoast	Foray Newfoundland and Labrador	New Foundland, Canada	2011	September
A19a-227	A19a-227	Bedulis	6509549	30.0791	NovaSeq	47.6378	-52.9426	eastcoast	Foray Newfoundland and Labrador	New Foundland, Canada	2011	September
AL16	AL16	Bedulis	7403618	40.8714	NovaSeq	40.7237	-110.863	westcoast	Natural History Museum of Utah	Utah, USA	2018	na
B140	B140	Bedulis	2706765	23.6105	MiSeq	52.3859	0.736607	europe	University of Cambridge	England	2015	na
B51	B51	Bedulis	2463027	22.3027	MiSeq	52.3907	0.730854	europe	University of Cambridge	England	2015	na
B53	B53	Bedulis	3098655	27.4282	MiSeq	52.3903	0.736675	europe	University of Cambridge	England	2015	na
BD195	BD195	Bedulis	9183519	36.4514	NovaSeq	42.5558	-78.9455	eastcoast	Natural History Museum of Utah	New York, USA	2003	na
BD300	BD300	Bedulis	8388849	37.8987	NovaSeq	48.4059	-89.6258	eastcoast	Natural History Museum of Utah	Ontario, Canada	2003	na
BD572	K(M) 200472	Bedulis	2137653	25.0281	MiSeq	41.5051	24.3359	europe	Royal Botanic Gardens	Greece	2011	na
BD591	K(M) 263350	Bedulis	1345591	15.7332	MiSeq	51.0647	-0.093629	europe	Royal Botanic Gardens	England	2014	na
BD592	K(M) 263351	Bedulis	1826971	22.0026	MiSeq	51.0635	-0.095085	europe	Royal Botanic Gardens	England	2014	na
BD593	K(M) 263352	Bedulis	1919165	22.6392	MiSeq	51.0632	-0.99161	europe	Royal Botanic Gardens	England	2014	na
BD594	K(M) 263353	Bedulis	1965905	23.6392	MiSeq	50.9045	-1.59178	europe	Royal Botanic Gardens	England	2014	na
BD595	K(M) 263354	Bedulis	5047527	56.3711	MiSeq	50.9045	-1.59178	europe	Royal Botanic Gardens	England	2014	na
BD596	K(M) 263355	Bedulis	2054633	24.5432	MiSeq	50.8867	-1.55498	europe	Royal Botanic Gardens	England	2014	na
BD597	K(M) 263356	Bedulis	2144781	25.7071	MiSeq	50.8867	-1.55498	europe	Royal Botanic Gardens	England	2014	na
BD598	K(M) 263357	Bedulis	1854050	21.8677	MiSeq	50.8866	-1.5549	europe	Royal Botanic Gardens	England	2014	na
BD599	K(M) 263358	Bedulis	1950707	22.4039	MiSeq	50.8867	-1.55497	europe	Royal Botanic Gardens	England	2014	na
BD747	UT-M0000002	Bedulis	8532753	33.4675	HiSeq2500	40.6243	-110.961	westcoast	Natural History Museum of Utah	Utah, USA	2017	na
Bi126	Bi126	Bedulis	1012824	11.0666	MiSeq	52.061	8.47138	europe	University of Cambridge	Germany	2015	na
Bi58	Bi58	Bedulis	1184884	12.5061	MiSeq	52.0381	8.48688	europe	University of Cambridge	Germany	2015	na
Bi81	Bi81	Bedulis	4501547	33.7478	MiSeq	52.0381	8.48688	europe	University of Cambridge	Germany	2015	na
C109468	C-F-109468	Bedulis	14178957	58.4963	NovaSeq	55.7593	12.3656	europe	Museum Botanicum Hauniense	Denmark	2018	August
C118985	C-F-118985	Bedulis	5331042	18.3628	NovaSeq	62.526	15.6213	europe	Museum Botanicum Hauniense	Sweden	1987	August
C1411	C1411	Bedulis	879964	9.61914	MiSeq	52.4619	0.677378	europe	University of Cambridge	England	2014	na
C153	C153	Bedulis	1294379	12.2834	MiSeq	52.9147	1.09211	europe	University of Cambridge	England	2009	na
CBHV16-153	CBHV16-153	Bedulis	8532753	34.8315	NovaSeq	53.3059	-60.1722	eastcoast	Foray Newfoundland and Labrador	Newfoundland and Labrador, Canada	2016	September
CBHV17-101	CBHV17-101	Bedulis	7248138	32.9413	NovaSeq	48.9295	-57.8982	eastcoast	Foray Newfoundland and Labrador	Newfoundland and Labrador, Canada	2017	August
CEP53	CEP53	Bedulis	1075223	7.8381	MiSeq	52.3647	0.614834	europe	University of Cambridge	England	2009	na
darkcap	MO278521-2	Bedulis	9129950	48.1925	HiSeq2500	41.608	-72.1408	eastcoast	Natural History Museum of Utah	Connecticut, USA	2017	na
DBG-F-21467	DBG-F-21467	non-edulis	na	na	NovaSeq	na	na	na	Denver Botanic Gardens
DBG-F-001332	DBG-F-001332	Bedulis	8909511	41.8963	NovaSeq	39.589	-105.305	colorado	Denver Botanic Gardens	Colorado, USA	1967	July
DBG-F-005044	DBG-F-005044	Bedulis	4123581	15.4812	NovaSeq	40.079	-105.568	colorado	Denver Botanic Gardens	Colorado, USA	1974	August
DBG-F-017417	DBG-F-017417	Bedulis	7102031	30.7517	NovaSeq	40.5466	-106.682	colorado	Denver Botanic Gardens	Colorado, USA	1994	July
DBG-F-017870	DBG-F-017870	Bedulis	12977366	54.0485	NovaSeq	39.9789	-105.549	colorado	Denver Botanic Gardens	Colorado, USA	1995	July
DBG-F-023282	DBG-F-023282	Bedulis	3504753	16.8792	NovaSeq	39.5552	-105.379	colorado	Denver Botanic Gardens	Colorado, USA	2001	July
DBG-F-024649	DBG-F-024649	Bedulis	12076481	51.0628	NovaSeq	40.3429	-105.674	colorado	Denver Botanic Gardens	Colorado, USA	2008	August
DBG-F-024695	DBG-F-024695	Bedulis	1396238	8.86305	MiSeq	40.3132	-105.648	colorado	Denver Botanic Gardens	Colorado, USA	2008	August
DBG-F-025235	DBG-F-025235	Bedulis	14791109	62.0102	NovaSeq	40.3429	-105.674	colorado	Denver Botanic Gardens	Colorado, USA	2010	August
DJM1345		Bedulis	8166769	37.7341	NovaSeq	44.0462	-124.1	westcoast	Minnesota	Oregon, USA	2013	na
DLC2210	DLC-2002-210	non-edulis	na	na	NovaSeq	na	na	non-edulis	Center for Forest Mycology Research
DUKE-0193972	DUKE-0193972	Bedulis	10452312	43.2724	NovaSeq	46.6049	-85.203	eastcoast	Duke University Herbarium	Michigan, USA	2019	August
DUKE-0350624	DUKE-0350624	non-edulis	na	na	NovaSeq	na	na	non-edulis	Duke University Herbarium
DUKE-0350792	DUKE-0350792	Bedulis	10452312	44.8713	NovaSeq	45.5371	-122.266	westcoast	Duke University Herbarium	Oregon, USA	2015	October
DUKE-0351102	DUKE-0351102	Bedulis	7865629	35.1702	NovaSeq	45.5318	-122.291	westcoast	Duke University Herbarium	Oregon, USA	2016	October
DUKE-0351166	DUKE-0351166	Bedulis	7747475	37.0427	NovaSeq	46.1088	-122.982	westcoast	Duke University Herbarium	Oregon, USA	2016	October
DUKE-0351781	DUKE-0351781	non-edulis	na	na	NovaSeq	na	na	non-edulis	Duke University Herbarium
F-75196	O-F-75196	Bedulis	6605921	31.7777	NovaSeq	60.2922	10.6895	europe	Natural History Museum of Oslo	Norway	2014	August
F-75615	O-F-75195	Bedulis	7871546	37.7718	NovaSeq	59.7359	10.7281	europe	Natural History Museum of Oslo	Norway	2014	September
FA-16929	FA-16929	Bedulis	8298006	38.5231	NovaSeq	65.7083	-17.8866	europe	Icelandic Institute of Natural History	Iceland	2002	August
FA-18247	FA-18247	Bedulis	11004335	49.0946	NovaSeq	64.5231	-21.4344	europe	Icelandic Institute of Natural History	Iceland	2005	September
FA-18312	FA-18312	Bedulis	5189444	18.4851	NovaSeq	64.5324	-21.4371	europe	Icelandic Institute of Natural History	Iceland	2005	September
GAL19447b	WTU-F-031876	Bedulis	993482	8.06774	MiSeq	64.9525	-148.353	alaska	Burke Museum	Alaska, USA	2006	na
GAL3858	WTU-F-019373	Bedulis	2537284	21.5402	MiSeq	58.3759	-134.73	BC	Burke Museum	Alaska, USA	1989	na
GM14a-347	GM14a-347	Bedulis	6306539	30.3634	NovaSeq	49.3543	-57.1991	eastcoast	Foray Newfoundland and Labrador	Newfoundland and Labrador, Canada	2014	September
GM15a-213	GM15a-213	Bedulis	6004794	7.5143	NovaSeq	49.5196	-57.8779	eastcoast	Foray Newfoundland and Labrador	Newfoundland and Labrador, Canada	2015	September
GM15b-045	GM15b-045	Bedulis	6801272	32.2305	NovaSeq	49.5196	-57.8779	eastcoast	Foray Newfoundland and Labrador	Newfoundland and Labrador, Canada	2015	September
GM4-039	GM4-039	Bedulis	5888617	26.8851	NovaSeq	49.4539	-57.7534	eastcoast	Foray Newfoundland and Labrador	Newfoundland and Labrador, Canada	2014	September
HL1	HL1	Bedulis	7804317	42.2693	NovaSeq	40.7237	-110.863	westcoast	Natural History Museum of Utah	Utah, USA	2019	September
HL2	HL2	Bedulis	7880010	43.6686	NovaSeq	40.7237	-110.863	westcoast	Natural History Museum of Utah	Utah, USA	2019	September
HL3	HL3	Bedulis	7703555	42.3991	NovaSeq	40.7237	-110.863	westcoast	Natural History Museum of Utah	Utah, USA	2019	September
ITALY1	ITALY1	non-edulis	na	na	NovaSeq	na	na	non-edulis	Natural History Museum of Utah
JA-2013	JFA2013	Bedulis	889538	5.35115	NovaSeq	46.5913	-87.4606	eastcoast	University of Minnesota Herbarium	Michigan, USA	2013	na
JWR839	JWR-839	Bedulis	10731221	43.0378	NovaSeq	35.6244	-105.55	colorado	Center for Forest Mycology Research	New Mexico	1968	August
KD11096	KD-11-096	non-edulis	na	na	HiSeq2500	na	na	non-edulis	Indian Botanic Garden	India	2011	August
KR-M-0043679	KR-M-0043679	Bedulis	35263290	140.277	NovaSeq	48.5636	8.2408	europe	Staatliches Museum fur Naturkunde Karlsruhe	Germany	2015	November
lightcap	MO278521	Bedulis	7522723	42.666	HiSeq2500	41.608	-72.1408	eastcoast	Natural History Museum of Utah	Connecticut, USA	2017	na
MIN794253	MIN794253	Bedulis	894654	5.26604	NovaSeq	46.5213	-94.1744	eastcoast	University of Minnesota Herbarium	Minnesota	1971	September
MIN840070	MIN840070	non-edulis	na	na	NovaSeq	na	na	non-edulis	University of Minnesota Herbarium
MIN905177	MIN905177	Bedulis	7908468	31.1252	NovaSeq	48.3944	-89.6195	eastcoast	University of Minnesota Herbarium	Ontario	2012	September
MIN905190	MIN905190	Bedulis	7950079	33.685	NovaSeq	46.7567	-94.09	eastcoast	University of Minnesota Herbarium	Minnesota	2004	September
MIN905362	MIN905362	Bedulis	21138504	80.6284	NovaSeq	46.8532	-92.0139	eastcoast	University of Minnesota Herbarium	Minnesota	2004	July
MIN905373	MIN905373	Bedulis	12810259	52.7093	NovaSeq	46.842	-92.0087	eastcoast	University of Minnesota Herbarium	Minnesota	2004	July
MIN921552	MIN921552	Bedulis	8447915	31.2962	NovaSeq	41.9542	-78.7417	eastcoast	University of Minnesota Herbarium	Pennsylvania	2003	July
MIN921562	MIN921562	Bedulis	7994490	36.9926	NovaSeq	41.9544	-78.742	europe	University of Minnesota Herbarium	Pennsylvania	2003	July
MIN921570	MIN921570	Bedulis	7591680	34.6193	NovaSeq	39.0108	-107.007	colorado	University of Minnesota Herbarium	Colorado	2006	August
MIN921979	MIN921979	Bedulis	8223769	38	NovaSeq	59.8422	17.623	europe	University of Minnesota Herbarium	Sweden	2005	July
MIN921981	MIN921981	Bedulis	8116773	1978	NovaSeq	59.833	17.6	europe	University of Minnesota Herbarium	Sweden	2005	July
MIN921986	MIN921986	Bedulis	6939303	32.5522	NovaSeq	59.8313	17.5733	europe	University of Minnesota Herbarium	Sweden	2005	August
MIN921988	MIN921988	Bedulis	7324069	33.7478	NovaSeq	59.837	17.6231	europe	University of Minnesota Herbarium	Sweden	2005	August
MIN923288	MIN923288	Bedulis	12151463	55.1544	NovaSeq	43.8825	-124.124	westcoast	University of Minnesota Herbarium	Oregon	2006	November
MIN929293	MIN929293	Bedulis	14828974	63.7453	NovaSeq	44.0638	-124.117	westcoast	University of Minnesota Herbarium	Oregon	2003	November
MS1-015	MS1-015	Bedulis	9166819	42.5856	NovaSeq	48.9714	-55.5399	eastcoast	Foray Newfoundland and Labrador	Newfoundland and Labrador, Canada	2008	September
MS4-004	MS4-004	Bedulis	6503996	30.4916	NovaSeq	48.966	-55.5435	eastcoast	Foray Newfoundland and Labrador	Newfoundland and Labrador, Canada	2008	September
MS9-005	MS9-005	Bedulis	7703339	32.5792	NovaSeq	48.9706	-55.5403	eastcoast	Foray Newfoundland and Labrador	Newfoundland and Labrador, Canada	2009	na
NYBG-02342749	NYBG-02342749	Bedulis	578466	4.11916	NovaSeq	41.7126	-76.4747	eastcoast	New York Botanic Garden	Pennsylvania	1973	July
NYBG-02343065	NYBG-02343065	Bedulis	554571	2.75933	NovaSeq	41.9905	-93.8804	eastcoast	New York Botanic Garden	Iowa	1975	July
NYBG-02343069	NYBG-02343069	Bedulis	649862	4.5891	NovaSeq	43.9526	-110.627	westcoast	New York Botanic Garden	Wyoming, USA	1990	September
NYBG-0399897	NYBG-0399897	Bedulis	10377320	47.3797	NovaSeq	41.6696	-72.1089	eastcoast	New York Botanic Garden	Connecticut, USA	2015	June
NYBG-36585	NYBG-36585	Bedulis	1427121	7.5281	NovaSeq	44.4163	-72.6573	eastcoast	New York Botanic Garden	Vermont, USA	1964	June
R029174	KR-M-0029174	Bedulis	4536740	18.2452	NovaSeq	48.9572	8.52123	europe	Staatliches Museum fur Naturkunde Karlsruhe	Germany	2011	August
RL1	RL1	Bedulis	10374283	57.7516	NovaSeq	40.7339	-110.873	westcoast	Natural History Museum of Utah	Utah, USA	2019	na
RL2	RL2	Bedulis	7651324	42.2081	NovaSeq	40.7339	-110.873	westcoast	Natural History Museum of Utah	Utah, USA	2019	na
RL3	RL3	Bedulis	8683116	43.3398	NovaSeq	40.7339	-110.873	westcoast	Natural History Museum of Utah	Utah, USA	2019	na
RL5	RL5	Bedulis	8102395	44.7423	NovaSeq	40.7339	-110.873	westcoast	Natural History Museum of Utah	Utah, USA	2019	na
SMB-091601	SMB-091601	Bedulis	2764214	3.27858	NovaSeq	42.2636	0.573338	europe	Spanish Mycologic Society	Spain	2004	September
SMB-4100903	SMB-4100903	non-edulis	2519736	na	NovaSeq	na	na	non-edulis	Spanish Mycologic Society	Spain	2003	October
SV11-604	SV11-604	Bedulis	16914379	75.1055	NovaSeq	52.7125	-114.111	eastcoast	Personal Collection of Suzanne Visser	Alberta, Canada	2011	August
TAAM071290	TAAM071290	Bedulis	461640	2.09343	NovaSeq	59.2617	26.9633	europe	Estonian University of Life Sciences	Estonia	1959	August
TAAM084615	TAAM084615	Bedulis	45827	3.57733	NovaSeq	53.0167	158.65	europe	Estonian University of Life Sciences	Russia	1978	July
TAAM084633	TAAM084633	Bedulis	368880	3.57733	NovaSeq	52.95	158.233	europe	Estonian University of Life Sciences	Russia	1978	July
TAAM113112	TAAM113112	Bedulis	387787	3.61196	NovaSeq	53.4017	158.396	europe	Estonian University of Life Sciences	Russia	1978	August
TAAM132367	TAAM132367	Bedulis	8054553	38.1913	NovaSeq	60.297	24.9628	europe	Estonian University of Life Sciences	Finland	1994	September
TAAM132753	TAAM132753	Bedulis	228258	2.41971	NovaSeq	60.277	24.9631	europe	Estonian University of Life Sciences	Finland	2000	August
TAAM132776	TAAM132776	Bedulis	1917068	9.6875	NovaSeq	60.7629	25.6005	europe	Estonian University of Life Sciences	Finland	2000	July
TAAM175085	TAAM175085	Bedulis	5493765	24.2289	NovaSeq	43.3873	41.7055	europe	Estonian University of Life Sciences	Russia	1999	August
TAAM185627	TAAM185627	Bedulis	6082411	25.4114	NovaSeq	59.58	24.505	europe	Estonian University of Life Sciences	Estonia	2003	September
TR39322	TROM-39322	Bedulis	5111369	16.7481	NovaSeq	69.7206	19.2653	europe	The Arctic Univeristy Museum of Norway and Academy of Fine Arts, University of Tromso	Norway	2001	September
UBC-16706	UBC-F-16706	Bedulis	6500292	31.071	NovaSeq	52.6582	-131.506	BC	University of British Columbia Herbarium	British Columbia, Canada	2008	September
UBC-30908	UBC-F-30908	non-edulis	na	na	NovaSeq	na	na	non-edulis	University of British Columbia Herbarium	British Columbia, Canada	2012	May
UBC-32159	UBC-F-32159	Bedulis	10570379	48.2394	NovaSeq	49.2395	-123.104	westcoast	University of British Columbia Herbarium	British Columbia, Canada	2015	October
UBC-33027	UBC-F-33027	Bedulis	7181967	27.5472	NovaSeq	50.0627	-123.099	BC	University of British Columbia Herbarium	British Columbia, Canada	2016	October
UBC-12520	UBC-F-12520	Bedulis	5005244	23.7347	NovaSeq	49.3018	-123.147	BC	University of British Columbia Herbarium	British Columbia, Canada	1986	July
UBC-13306	UBC-F-13306	Bedulis	190675	3.93486	NovaSeq	50.0333	-123.117	europe	University of British Columbia Herbarium	British Columbia, Canada	1990	September
UBC-15479	UBC-F-15479	Bedulis	5501891	26.6638	NovaSeq	52.6922	-131.767	BC	University of British Columbia Herbarium	British Columbia, Canada	2004	September
UBC-16737	UBC-F-16737	Bedulis	5899681	28.6368	NovaSeq	52.5158	-131.518	BC	University of British Columbia Herbarium	British Columbia, Canada	2008	September
UBC-18518	UBC-F-18518	Bedulis	7586875	37.8024	NovaSeq	54.7667	-127.167	westcoast	University of British Columbia Herbarium	British Columbia, Canada	2003	July
UBC-28267	UBC-F-28267	Bedulis	7018645	33.2237	NovaSeq	51.26	-117.493	BC	University of British Columbia Herbarium	British Columbia, Canada	2013	August
UBC-28296	UBC-F-28296	Bedulis	7594046	34.1376	NovaSeq	48.4383	-124.084	BC	University of British Columbia Herbarium	British Columbia, Canada	2013	September
UT485	UT-M0000485	non-edulis	na	na	HiSeq2500	na	na	non-edulis	Natural History Museum of Utah	Minnesota,USA	2018	July
UT508	UT-M0000508	non-edulis	na	na	HiSeq2500	na	na	non-edulis	Natural History Museum of Utah	New Jersey,USA	2017	July
UT-M0000480	UT-M0000480	non-edulis	na	na	HiSeq2500	na	na	non-edulis	Natural History Museum of Utah	Utah, USA	2017	August
VOL5	VOL5	Bedulis	10876045	59.37	NovaSeq	40.6397	-110.95	westcoast	Natural History Museum of Utah	Utah, USA	2019	na
WS54583	WS54583	non-edulis	na	ns	NovaSeq	ns	ns	non-edulis	Washington State University		na
WSP54517	WSP54517	Bedulis	5935435	27.0609	NovaSeq	45.0417	-116.13	westcoast	Washington State University	Idaho	1964	August
WTU-F-024032	WTU-F-024032	Bedulis	6675193	29.0922	NovaSeq	60.4083	-149.369	alaska	University of Washington Herbarium	Alaska	1998	July
WTU-F-027121	WTU-F-027121	Bedulis	3558331	15.4604	NovaSeq	64.9215	-147.932	alaska	University of Washington Herbarium	Alaska	2005	July
WTU-F-030041	WTU-F-030041	Bedulis	3558331	33.5706	NovaSeq	68.6283	-149.598	alaska	University of Washington Herbarium	Alaska	2006	July
WTU-F-032261	WTU-F-032261	Bedulis	6966630	42.8288	NovaSeq	68.6251	-149.593	alaska	University of Washington Herbarium	Alaska	2006	July
WTU-F-068809	WTU-F-068809	Bedulis	8562829	27.7633	NovaSeq	60.9966	-149.086	BC	University of Washington Herbarium	Alaska	2016	August
WTU-F-71222	WTU-F-71222	Bedulis	24507620	60.5497	NovaSeq	47.4447	-123.502	BC	University of Washington Herbarium	Washington	2018	September
YSU-F-09911	YSU-F-09911	Bedulis	8560517	37.4044	NovaSeq	61.0557	69.4261	alaska	Yurga State University	Khanty-Mansiyskiy, Russia	2020	September
YSU-F-09929	YSU-F-09929	Bedulis	8869011	38.8416	NovaSeq	61.083	69.456	alaska	Yurga State University	Khanty-Mansiyskiy, Russia	2020	July
YSU-F-05349	YSU-F-05349	Bedulis	16751084	66.8451	NovaSeq	61.0665	69.4666	alaska	Yurga State University	Khanty-Mansiyskiy, Russia	2015	July
YSU-F-05404	YSU-F-05404	Bedulis	15490434	58.5577	NovaSeq	61.0572	69.4071	alaska	Yurga State University	Khanty-Mansiyskiy, Russia	2015	July
YSU-F-07119	YSU-F-07119	Bedulis	12104242	51.9332	NovaSeq	61.0564	69.4049	alaska	Yurga State University	Khanty-Mansiyskiy, Russia	2016	August
YSU-F-08209	YSU-F-08209	Bedulis	11044423	47.3249	NovaSeq	61.0627	69.478	alaska	Yurga State University	Khanty-Mansiyskiy, Russia	2019	July
YSU-F-09148	YSU-F-09148	Bedulis	20406143	56.328	NovaSeq	61.0537	69.428	alaska	Yurga State University	Khanty-Mansiyskiy, Russia	2019	August
YSU-F-09856	YSU-F-09856	Bedulis	17875135	71.0498	NovaSeq	61.0537	69.428	alaska	Yurga State University	Khanty-Mansiyskiy, Russia	2020	July
YSU-F-09901	YSU-F-09901	Bedulis	33380804	66.78	NovaSeq	61.0546	69.4055	alaska	Yurga State University	Khanty-Mansiyskiy, Russia	2020	July

## Sheet: pairwise_population_analyses
population_pairwise_comparison	mean_Fst_10KBwindow	mean_Fst_genes	mean_Dxy_10KBwindows	mean_Dxy_genes	genetic_distance	phylogenetic_dist	curent_niche_overlap	LGM_niche_overlap	delta(current-lgm)_niche_overlap
ak/bc	0.5096	0.511	0.1305	0.133	6456	5.07624	0.567354	0.428522	0.138832
ak/co	0.4963	0.497	0.1311	0.133	6434	5.07624	0.366276	0.513797	-0.147521
ak/ec	0.2739	0.261	0.1112	0.111	6406	3.0547	0.43824	0.355758	0.082482
ak/eu	0.3957	0.404	0.1202	0.124	6027	5.31178	0.360802	0.406186	-0.0453836
ak/wc	0.4569	0.456	0.1251	0.128	6271	5.07624	0.331808	0.241592	0.0902157
bc/co	0.5597	0.558	0.1263	0.128	6276	4.09603	0.330412	0.537462	-0.20705
bc/ec	0.4324	0.426	0.1304	0.132	7131	5.07624	0.339813	0.27724	0.0625726
bc/eu	0.5396	0.534	0.1389	0.142	6370	5.31178	0.533257	0.451227	0.0820294
bc/wc	0.4451	0.442	0.111	0.114	5939	4.09603	0.554265	0.552894	0.0013718
co/ec	0.4202	0.415	0.1299	0.131	7178	5.07624	0.385573	0.431086	-0.0455125
co/eu	0.5527	0.548	0.1467	0.149	6536	5.31178	0.265827	0.372824	-0.106997
co/wc	0.4519	0.449	0.1123	0.114	6005	3.47074	0.334191	0.438263	-0.104072
ec/eu	0.4677	0.457	0.1453	0.148	7256	5.31178	0.406426	0.598263	-0.191837
ec/wc	0.3903	0.386	0.1227	0.125	7007	5.07624	0.24445	0.230789	0.0136607
eu/wc	0.5221	0.517	0.1408	0.145	6202	5.31178	0.498644	0.473417	0.0252273

## Sheet: bioclim_values
sampleID	Bio1	Bio2	Bio3	Bio4	Bio5	Bio6	Bio7	Bio8	Bio9	Bio10	Bio11	Bio12	Bio13	Bio14	Bio15	Bio16	Bio17	Bio18	Bio19
20100815009	5	129	36	7676	201	-149	350	-80	107	107	-84	699	77	39	21	218	128	128	214
240	84	85	28	7564	239	-61	300	177	-5	177	-19	528	74	25	34	200	81	200	89
242	67	70	24	7621	215	-69	284	161	14	161	-35	619	80	29	30	219	95	219	117
244	80	71	26	7256	221	-51	272	170	27	170	-17	648	82	29	28	220	103	220	124
249	102	112	44	4973	251	1	250	46	167	167	42	1273	206	21	62	609	92	92	559
250	136	149	58	3957	278	23	255	85	182	184	85	997	219	2	91	554	12	19	554
284	-2	126	36	7626	193	-152	345	-86	101	101	-89	699	77	40	20	215	133	133	210
285	-2	126	36	7626	193	-152	345	-86	101	101	-89	699	77	40	20	215	133	133	210
286	-2	126	36	7626	193	-152	345	-86	101	101	-89	699	77	40	20	215	133	133	210
354	95	76	39	4126	207	15	192	51	148	149	45	2025	321	42	61	920	148	175	864
473	91	156	46	6309	293	-45	338	18	173	174	15	697	119	9	60	326	52	54	287
477	92	120	32	8981	285	-87	372	184	-27	205	-27	886	99	51	20	284	161	273	161
489	112	101	55	3087	212	29	183	80	150	153	76	2079	353	9	73	1019	71	87	948
555	7	130	36	7735	204	-148	352	-79	110	110	-84	681	75	38	21	211	125	125	207
557	31	145	38	8047	240	-140	380	-58	137	137	-68	539	54	32	17	158	103	103	157
567	31	145	38	8047	240	-140	380	-58	137	137	-68	539	54	32	17	158	103	103	157
598	103	119	32	8695	289	-75	364	206	-12	213	-12	1243	125	78	12	351	268	340	268
60	60	71	35	4490	167	-31	198	14	79	119	4	931	102	54	19	289	178	205	268
600	103	119	32	8695	289	-75	364	206	-12	213	-12	1243	125	78	12	351	268	340	268
90	27	141	37	7981	233	-140	373	-61	132	132	-70	582	60	34	18	174	109	109	172
A19a-203	50	75	27	6832	199	-78	277	-5	105	140	-34	1413	145	77	19	432	261	298	402
A19a-227	50	75	27	6832	199	-78	277	-5	105	140	-34	1413	145	77	19	432	261	298	402
AL16	-2	126	36	7626	193	-152	345	-86	101	101	-89	699	77	40	20	215	133	133	210
B140	95	72	34	4842	207	-3	210	69	59	157	33	580	55	33	12	159	124	154	133
B51	94	72	34	4835	207	-4	211	68	59	157	33	582	55	33	12	159	124	156	133
B53	95	72	34	4842	207	-3	210	69	59	157	33	580	55	33	12	159	124	154	133
BD195	84	107	29	9086	270	-91	361	103	-28	198	-36	1034	105	60	15	292	205	281	226
BD300	24	125	26	11355	247	-218	465	151	-115	161	-132	717	87	29	32	249	112	248	112
BD572	64	92	33	6620	216	-62	278	-2	118	149	-19	689	72	34	22	207	118	158	194
BD591	96	82	38	4711	216	5	211	72	58	158	38	690	70	44	15	208	150	154	179
BD592	96	82	38	4711	216	5	211	72	58	158	38	690	70	44	15	208	150	154	179
BD593	91	76	35	4904	210	-6	216	38	141	155	29	882	98	54	20	286	175	178	256
BD594	100	78	37	4605	216	10	206	53	145	161	44	783	88	44	22	256	152	155	229
BD595	100	78	37	4605	216	10	206	53	145	161	44	783	88	44	22	256	152	155	229
BD596	102	78	38	4596	217	12	205	55	147	163	46	775	86	44	22	254	150	153	226
BD597	102	78	38	4596	217	12	205	55	147	163	46	775	86	44	22	254	150	153	226
BD598	102	78	38	4596	217	12	205	55	147	163	46	775	86	44	22	254	150	153	226
BD599	102	78	38	4596	217	12	205	55	147	163	46	775	86	44	22	254	150	153	226
BD747	23	140	37	7934	228	-142	370	-64	128	128	-73	582	60	34	18	173	110	110	171
Bi126	89	75	32	5781	217	-14	231	163	48	163	17	830	90	56	14	248	172	248	203
Bi58	87	74	32	5710	213	-16	229	160	45	160	15	852	92	58	14	252	177	252	211
Bi81	87	74	32	5710	213	-16	229	160	45	160	15	852	92	58	14	252	177	252	211
C109468	83	65	27	6187	208	-28	236	157	29	163	8	616	68	31	22	193	108	184	117
C118985	33	83	25	8328	202	-124	326	127	-64	141	-75	586	82	28	34	221	93	214	108
C1411	93	73	34	4857	206	-5	211	67	58	156	31	596	58	35	12	165	127	159	138
C153	101	65	31	4922	210	6	204	49	64	164	39	650	67	43	14	187	136	166	165
CBHV16-153	39	79	24	8131	208	-120	328	-29	10	145	-63	1204	132	66	21	387	222	286	305
CBHV17-101	0	101	23	10651	209	-214	423	127	-84	132	-143	946	107	59	19	298	192	297	204
CEP53	92	74	35	4805	205	-6	211	154	57	154	31	571	53	33	12	157	121	157	127
DBG-1332	48	175	45	7355	254	-134	388	146	-42	146	-42	463	65	14	44	176	52	176	52
DBG-17417	-5	141	39	7685	193	-162	355	-26	6	96	-97	629	59	44	9	171	144	159	155
DBG-17870	16	152	42	7193	210	-147	357	-3	25	111	-71	608	63	37	18	180	126	172	130
DBG-23282	28	163	43	7396	229	-147	376	125	-63	125	-63	497	69	20	38	184	69	184	69
DBG-24649	16	155	41	7506	218	-152	370	90	-25	114	-76	561	59	35	18	166	115	164	117
DBG-24695	12	151	41	7406	210	-153	363	-8	-29	109	-78	593	61	37	17	173	124	168	127
DBG-25235	16	155	41	7506	218	-152	370	90	-25	114	-76	561	59	35	18	166	115	164	117
DBG-5044	0	140	40	7258	189	-155	344	-22	10	97	-86	685	73	41	16	206	141	182	156
DJM1345	111	96	51	3426	215	28	187	73	152	156	69	1991	329	20	66	942	111	114	884
DUKE-0350792	109	104	40	5241	260	6	254	50	176	177	44	1792	274	26	55	787	144	146	738
DUKE-0351102	108	104	40	5205	258	4	254	48	175	175	43	1808	276	27	55	795	146	147	744
DUKE-0351166	109	107	43	4958	253	7	246	51	172	173	47	1259	198	22	57	570	107	114	522
DUKE-0913972	47	100	26	9386	235	-137	372	127	-30	161	-77	832	94	45	21	259	145	237	181
F-75196	26	75	25	7838	188	-109	297	115	-32	129	-74	783	97	39	29	270	125	263	145
F-75615	65	65	23	7344	211	-61	272	116	6	161	-28	741	87	36	28	253	123	224	140
FA-16929	25	64	34	4497	130	-58	188	-3	43	88	-24	685	80	33	24	218	111	142	196
FA-18247	38	49	30	4072	127	-34	161	13	80	94	-7	901	100	52	20	275	164	180	256
FA-18312	28	50	30	4122	119	-44	163	3	71	85	-17	963	105	56	19	290	178	194	273
GAL19447b	-60	105	22	13707	194	-280	474	116	-142	116	-231	296	60	7	72	164	29	164	39
GAL3858	48	70	28	6039	178	-68	246	93	42	126	-28	1486	220	72	35	561	249	349	340
GM14-347	37	93	26	8248	216	-129	345	9	9	143	-66	1042	107	59	17	310	198	269	248
GM15-045	40	82	24	8186	206	-123	329	-31	12	144	-64	1085	113	57	19	330	200	277	260
GM15-213	40	82	24	8186	206	-123	329	-31	12	144	-64	1085	113	57	19	330	200	277	260
GM4-039	41	84	25	8209	211	-123	334	-29	14	147	-62	1071	111	57	19	326	199	272	258
HL1	-2	126	36	7626	193	-152	345	-86	101	101	-89	699	77	40	20	215	133	133	210
HL2	-2	126	36	7626	193	-152	345	-86	101	101	-89	699	77	40	20	215	133	133	210
HL3	-2	126	36	7626	193	-152	345	-86	101	101	-89	699	77	40	20	215	133	133	210
JA-2013	42	114	28	10080	247	-158	405	121	-81	167	-92	807	95	39	22	254	143	232	143
JWR839	61	162	46	6554	243	-105	348	140	-8	148	-20	564	104	25	55	263	81	253	83
KR43679	65	81	32	6160	198	-51	249	142	20	142	-15	1203	119	82	13	343	264	343	304
MIN-794253	45	129	26	11950	273	-207	480	191	-119	191	-119	697	104	15	52	296	57	296	57
MIN-905177	24	126	27	11347	247	-218	465	151	-115	161	-132	717	86	29	31	248	113	247	113
MIN-905362	41	100	24	10419	242	-174	416	167	-102	167	-102	723	97	17	47	285	70	285	70
MIN-905373	41	100	23	10432	243	-174	417	168	-101	168	-101	722	97	17	47	284	70	284	70
MIN-921552	65	121	32	8824	254	-117	371	174	-43	174	-54	1141	126	65	17	337	216	337	228
MIN-921562	76	109	30	9039	262	-101	363	95	-36	188	-45	1102	110	66	14	308	220	297	247
MIN-921570	-5	160	40	8219	197	-203	400	95	28	100	-109	565	57	33	15	160	117	146	149
MIN-921979	56	70	24	7497	209	-75	284	143	-6	155	-37	555	70	27	30	198	87	187	114
MIN-921981	57	70	24	7488	209	-75	284	143	-6	155	-37	555	70	27	30	198	87	187	114
MIN-921986	56	70	24	7495	208	-76	284	142	-7	154	-38	559	71	27	31	200	87	189	115
MIN-921988	55	70	24	7503	207	-76	283	141	-7	154	-38	561	71	28	31	200	88	190	115
MIN-923288	108	96	51	3379	212	26	186	71	149	153	67	1937	320	19	66	918	106	110	861
MIN-929293	112	94	51	3320	213	31	182	76	152	156	72	1994	329	20	66	942	112	116	885
MS1-015	47	98	27	8431	236	-119	355	115	76	156	-59	1038	102	71	11	290	227	262	266
MS4-004	47	98	27	8438	235	-119	354	115	76	156	-59	1040	102	71	11	290	227	262	267
MS9-005	47	98	27	8431	236	-119	355	115	76	156	-59	1038	102	71	11	290	227	262	266
NYBG-02343069	12	164	38	8923	246	-181	427	-88	121	127	-102	627	79	34	26	217	112	121	210
NYBG-03999897	92	118	32	8670	277	-90	367	51	202	202	-23	1220	118	90	8	330	287	287	299
NYBG-36585	36	106	27	9817	229	-161	390	158	-83	158	-95	1246	135	71	17	373	237	373	253
R029174	100	88	33	6487	246	-19	265	166	28	182	15	760	88	48	18	237	153	237	165
RL1	0	127	36	7628	195	-151	346	-85	102	102	-88	689	75	40	20	211	131	131	207
RL2	0	127	36	7628	195	-151	346	-85	102	102	-88	689	75	40	20	211	131	131	207
RL3	0	127	36	7628	195	-151	346	-85	102	102	-88	689	75	40	20	211	131	131	207
RL5	0	127	36	7628	195	-151	346	-85	102	102	-88	689	75	40	20	211	131	131	207
SMB-091601	100	97	37	5803	244	-16	260	119	27	175	27	848	93	52	18	253	173	216	173
SV11-604	19	144	33	10090	224	-212	436	141	-41	141	-116	493	94	16	66	249	56	249	59
TAAM-132367	49	65	21	8151	208	-92	300	142	-19	157	-52	650	78	33	30	221	105	196	135
TAAM-132776	43	72	22	8502	212	-106	318	139	-25	155	-64	640	80	32	30	220	103	199	129
TAAM-175085	67	103	35	6604	221	-69	290	129	-14	149	-18	1024	137	49	30	357	161	352	174
TAAM-185627	53	67	22	7965	210	-87	297	146	-15	157	-46	656	79	30	32	228	98	205	132
TAAM-71290	48	70	22	8632	216	-101	317	144	-57	160	-62	608	78	26	33	216	90	196	105
TR39322	2	57	24	6208	138	-97	235	-34	26	89	-69	848	102	42	24	266	143	189	245
UBC-12520	98	77	33	5291	226	-2	228	38	167	167	33	1300	201	37	52	564	133	133	520
UBC-15479	82	56	33	3913	180	12	168	63	131	136	38	3384	480	95	44	1302	342	459	1165
UBC-16706	80	52	32	3762	172	13	159	63	127	132	38	2674	369	86	42	1017	302	392	898
UBC-16737	84	52	32	3743	176	17	159	67	130	137	42	2743	380	86	42	1041	307	401	919
UBC-18518	39	104	29	8110	217	-130	347	-15	44	139	-70	537	66	19	31	182	76	137	146
UBC-28267	12	95	28	8018	199	-135	334	-85	55	115	-91	1290	186	61	40	523	209	228	503
UBC-28296	92	84	40	4368	214	7	207	44	147	149	39	1884	305	35	63	883	125	154	816
UBC-32159	97	79	34	5217	224	-2	226	39	165	165	33	1292	200	36	52	561	132	132	519
UBC-33027	67	89	29	6883	236	-68	304	-15	154	154	-21	1250	191	40	53	552	142	142	489
VOL5	18	136	37	7902	221	-144	365	-69	124	124	-76	608	64	35	19	183	114	114	181
WSU-54517	22	159	41	7382	240	-141	381	-59	114	118	-70	714	93	25	33	255	99	117	246
WTU-24032	-43	75	21	10135	138	-208	346	83	-75	91	-160	390	83	16	63	197	50	159	60
WTU-27121	-34	101	20	14117	219	-262	481	143	-111	143	-214	301	56	7	61	150	29	150	45
WTU-30041	48	70	28	6039	178	-68	246	93	42	126	-28	1486	220	72	35	561	249	349	340
WTU-32261	-113	115	22	14624	167	-353	520	82	-231	82	-289	225	46	8	64	113	26	113	31
WTU-68809	17	84	28	7504	179	-116	295	13	98	116	-73	1005	130	44	32	343	155	196	292
WTU-71222	96	102	42	4939	238	0	238	40	160	160	36	2172	360	36	64	1025	141	141	963
YSU-05349	-16	88	18	13359	231	-249	480	156	-166	156	-191	544	79	20	43	218	69	218	79
YSU-05404	-16	88	18	13341	230	-249	479	155	-167	155	-191	547	79	20	42	218	69	218	80
YSU-07119	-16	88	18	13341	230	-249	479	155	-167	155	-191	547	79	20	42	218	69	218	80
YSU-08902	-15	88	18	13343	231	-249	480	155	-166	155	-191	543	79	20	43	218	69	218	79
YSU-09856	-16	88	18	13349	231	-249	480	156	-166	156	-190	544	79	20	43	218	69	218	79
YSU-09911	-16	88	18	13341	230	-249	479	155	-167	155	-191	547	79	20	42	218	69	218	80
YSU-09929	-16	88	18	13349	231	-249	480	156	-166	156	-190	544	79	20	43	218	69	218	79
darkcap	95	116	31	8644	278	-86	364	54	204	204	-19	1224	119	90	8	332	285	285	303
lightcap	95	116	31	8644	278	-86	364	54	204	204	-19	1224	119	90	8	332	285	285	303

## Sheet: outlier_gene_analysis
geneID	divergent_lineage	scaffold	outlier_snp_position_onScaffold	outlier_pval	predicted_function	X20100815009_0	X20100815009_1	X240_0	X240_1	X242_0	X242_1	X244_0	X244_1	X249_0	X249_1	X250_0	X250_1	X284_0	X284_1	X285_0	X285_1	X286_0	X286_1	X354_0	X354_1	X473_0	X473_1	X477_0	X477_1	X489_0	X489_1	X555_0	X555_1	X557_0	X557_1	X567_0	X567_1	X598_0	X598_1	X60_0	X60_1	X600_0	X600_1	X90_0	X90_1	A19a.203_0	A19a.203_1	A19a.227_0	A19a.227_1
EDU_000167	colorado	scaffold_1	552304	7.57e-50	GO:0003824, GO:0030170, GO:0009058; Dbxref=InterPro:IPR015421, PFAM:PF00155, InterPro:IPR015424, InterPro:IPR004839, InterPro:IPR015422; note=BUSCO:EOG092R0EQ9	A	A	G	G	G	G	G	G	A	A	A	A	A	A	A	A	A	A	A	A	A	A	G	G	A	A	A	A	A	A	A	A	G	G	G	G	G	G	A	A	G	G	G	G
EDU_000254	europe	scaffold_1	530782	6.66e-14	hypothetical protein	C	C	T	T	T	T	T	T	C	C	C	C	C	C	C	C	C	C	C	C	C	C	T	C	C	C	C	C	C	C	C	C	T	C	T	T	T	T	C	C	T	C	T	T
EDU_000244	europe	scaffold_1	386192	1.07e-07	hypothetical protein	C	C	A	A	A	A	A	A	C	C	NA	NA	C	C	C	C	C	C	C	C	C	C	NA	NA	C	C	C	C	C	C	C	C	C	C	A	A	NA	NA	C	C	NA	NA	NA	NA
EDU_001080	europe	scaffold_100	79699	8.2e-17	InterPro:IPR000782, PFAM:PF02469, InterPro:IPR036378, InterPro:IPR040200; note=SECRETED:SignalP(1-17,SECRETED:cutsite=AAA-SF,SECRETED:prob=0.4501)	C	C	A	A	A	A	A	A	NA	NA	C	C	C	C	C	C	NA	NA	C	C	NA	NA	C	C	NA	NA	NA	NA	C	C	NA	NA	C	C	A	A	C	C	NA	NA	C	C	C	C
EDU_001351	eastcoast	scaffold_109	90330	4.33e-27	hypothetical protein;note=SECRETED:SignalP(1-33,SECRETED:cutsite=VLA-LA,SECRETED:prob=0.3563)	T	T	C	C	C	C	C	C	T	T	T	T	T	T	T	T	T	T	T	T	T	T	C	C	T	T	T	T	T	T	T	T	C	C	C	C	C	C	T	T	C	C	C	C
EDU_002637	british_columbia	scaffold_13	333679	2.73e-08	InterPro:IPR036908,PFAM:PF03330,InterPro:IPR009009;note=EggNog:ENOG41,SECRETED:SignalP(1-19,SECRETED:cutsite=ILA-SP,SECRETED:prob=0.7077)	A	A	A	A	NA	NA	A	A	A	A	A	A	A	G	A	A	A	A	A	A	A	A	G	G	A	A	A	A	A	A	A	A	G	G	A	A	G	G	A	A	G	G	G	G
EDU_002637	westcoast	scaffold_13	333679	2.73e-08	InterPro:IPR036908,PFAM:PF03330,InterPro:IPR009009;note=EggNog:ENOG41,SECRETED:SignalP(1-19,SECRETED:cutsite=ILA-SP,SECRETED:prob=0.7077)	A	A	A	A	NA	NA	A	A	A	A	A	A	A	G	A	A	A	A	A	A	A	A	G	G	A	A	A	A	A	A	A	A	G	G	A	A	G	G	A	A	G	G	G	G
EDU_003213	europe	scaffold_142	66288	7.49e-61	GO:0004609,GO:0008654;Dbxref=InterPro:IPR000008,PFAM:PF02666,PFAM:PF00168,InterPro:IPR035892,InterPro:IPR003817,InterPro:IPR033177	T	T	C	C	C	C	C	C	C	T	T	T	T	T	T	T	T	T	T	T	T	T	C	C	T	T	T	T	T	T	T	T	C	C	C	C	C	C	T	T	C	C	C	C
EDU_003213	europe	scaffold_142	67526	2.38e-09	GO:0004609,GO:0008654;Dbxref=InterPro:IPR000008,PFAM:PF02666,PFAM:PF00168,InterPro:IPR035892,InterPro:IPR003817,InterPro:IPR033177	A	A	G	G	G	G	G	G	A	A	A	A	A	A	A	A	A	A	A	A	A	A	A	A	A	A	A	A	A	A	A	A	A	A	NA	NA	A	A	A	A	A	A	A	A
EDU_005824	british_columbia	scaffold_15	275556	2.83e-13	InterPro:IPR002716	A	A	A	A	A	A	A	A	A	A	A	A	A	A	A	A	A	A	A	A	A	A	G	G	A	A	A	A	A	A	A	A	G	G	A	A	G	G	A	A	G	G	G	G
EDU_006276	europe	scaffold_206	14040	1.39e-16	hypothetical protein	T	T	T	T	T	T	T	T	T	T	T	T	T	T	T	T	T	T	T	T	T	T	C	C	T	T	T	T	T	T	T	T	C	C	NA	NA	C	C	T	T	C	C	C	C
EDU_006276	westcoast	scaffold_206	14040	1.39e-16	hypothetical protein	T	T	T	T	T	T	T	T	T	T	T	T	T	T	T	T	T	T	T	T	T	T	C	C	T	T	T	T	T	T	T	T	C	C	NA	NA	C	C	T	T	C	C	C	C
EDU_008801	europe	scaffold_3	659847	3.17e-20	GO:0003886,GO:0008168,GO:0003682,GO:0090116,GO:0005634;Dbxref=PFAM:PF01426,InterPro:IPR029063,InterPro:IPR001525,InterPro:IPR022702,InterPro:IPR017198,InterPro:IPR001025,PFAM:PF12047,PFAM:PF00145,InterPro:IPR043151	A	G	A	A	NA	NA	A	A	G	G	A	G	G	G	A	G	G	G	G	G	G	G	A	A	G	G	G	G	G	G	G	G	A	A	NA	NA	A	A	G	G	A	A	A	A
EDU_008801	europe	scaffold_3	658966	7.42e-11	GO:0003886,GO:0008168,GO:0003682,GO:0090116,GO:0005634;Dbxref=PFAM:PF01426,InterPro:IPR029063,InterPro:IPR001525,InterPro:IPR022702,InterPro:IPR017198,InterPro:IPR001025,PFAM:PF12047,PFAM:PF00145,InterPro:IPR043151	TA	T	TA	TA	TA	TA	NA	NA	TA	TA	TA	T	TA	TA	TA	T	TA	TA	TA	TA	TA	TA	TA	TA	TA	TA	TA	TA	TA	TA	TA	TA	TA	TA	TA	TA	TA	TA	TA	TA	TA	TA	TA	TA
EDU_009151	europe	scaffold_30	176401	1.25e-15	PFAM:PF04193,InterPro:IPR006603;note=SECRETED:SignalP(1-25,SECRETED:cutsite=VYA-DQ,SECRETED:prob=0.4077)	A	A	T	T	T	T	T	T	A	A	A	A	A	A	A	A	A	A	A	A	A	A	A	A	A	A	A	A	A	A	A	A	A	A	T	T	A	A	A	A	A	A	A	A
EDU_009151	europe	scaffold_30	176450	3.35e-13	PFAM:PF04193,InterPro:IPR006603;note=SECRETED:SignalP(1-25,SECRETED:cutsite=VYA-DQ,SECRETED:prob=0.4077)	A	A	A	A	A	A	A	A	A	A	A	A	A	A	A	A	A	A	A	A	A	A	T	T	A	A	A	A	A	A	A	A	T	T	A	A	T	T	A	A	T	T	T	T
EDU_009628	europe	scaffold_326	20804	8.82e-13	hypothetical protein	G	G	A	A	A	A	A	A	G	G	G	G	G	G	G	G	G	G	G	G	G	G	G	G	G	G	G	G	G	G	G	G	G	G	A	A	G	G	G	G	G	G	G	G
EDU_009834	british_columbia	scaffold_335	22412	8.38e-08	GO:0034356,GO:0050262;Dbxref=InterPro:IPR026681	C	C	C	C	C	C	C	C	C	C	C	C	C	C	C	C	C	C	C	T	C	C	T	T	C	C	C	C	C	C	C	C	T	T	C	C	T	T	C	C	T	T	T	T
EDU_009931	colorado	scaffold_34	178444	5.13e-10	GO:0005515,GO:0031931,GO:0031932,GO:0031929;Dbxref=PFAM:PF00400,InterPro:IPR015943,InterPro:IPR036322,InterPro:IPR017986,InterPro:IPR020472,InterPro:IPR001680,InterPro:IPR037588;note=BUSCO:EOG092R0F7R	C	C	T	T	T	T	T	T	C	C	C	C	C	C	C	C	C	C	C	C	C	C	T	C	C	C	C	C	C	C	C	C	C	C	T	T	C	C	C	C	C	C	T	C
EDU_010436	british_columbia	scaffold_37	160570	7.34e-30	GO:0006508,GO:0004190;Dbxref=InterPro:IPR013320,InterPro:IPR038656,InterPro:IPR000250,PFAM:PF01828;note=SECRETED:SignalP(1-18,SECRETED:cutsite=VLA-AP,SECRETED:prob=0.6310)	G	G	G	G	G	G	G	G	G	G	G	G	G	G	G	G	G	G	G	G	G	G	G	G	G	G	G	G	G	G	G	G	G	G	G	G	G	G	G	G	G	G	G	G
EDU_012492	europe	scaffold_49	40428	6.33e-10	GO:0006281,GO:0005524,GO:0008094,GO:0003697,GO:0003677;Dbxref=InterPro:IPR013765,InterPro:IPR020588,InterPro:IPR027417,PFAM:PF08423	C	C	C	C	C	T	C	C	C	C	C	C	C	C	C	C	C	C	C	C	C	C	C	C	C	C	C	C	C	C	C	C	C	C	C	C	C	C	C	C	C	C	C	C
EDU_014451	british_columbia	scaffold_65	62961	8.92e-11	hypothetical protein	C	C	NA	NA	G	G	G	G	C	C	C	C	C	C	C	C	C	G	C	C	C	C	C	C	C	C	C	C	C	C	C	C	C	C	G	G	C	C	C	C	C	C	C	C
EDU_014451	colorado	scaffold_65	62961	8.92e-11	hypothetical protein	C	C	NA	NA	G	G	G	G	C	C	C	C	C	C	C	C	C	G	C	C	C	C	C	C	C	C	C	C	C	C	C	C	C	C	G	G	C	C	C	C	C	C	C	C
EDU_016302	westcoast	scaffold_90	28288	5.74e-10	hypothetical protein	T	T	T	T	T	T	T	T	T	T	T	T	T	T	T	T	T	T	T	T	T	T	T	T	T	T	T	T	T	T	T	T	T	T	T	T	T	T	T	T	T	T	T	C
[truncated: 230 more columns]
